# Supplementary material
Source: PubMed Central journal article supplement (PMC137787)
Supplement: pnas_232480899_1.pdf [file pnas_232480899_1.pdf]

**Table 1. Operational definitions of terms used to describe the behavior of the monkeys**

---

**Anxiety-like behaviors:**

Self-clasp: Manual or pedal gripping of self. Can be scored with any other behavior.

Self-groom: Personal manual grooming/scratching of the fur or skin. Can be scored with any other behavior.

Stereotypy: Any repetitive, patterned and rhythmic movement. Stereotypy is only scored following the third repetition of the motor act, and is scored thereafter whenever it occurs.

Stypic: Idiosyncratic non-locomotive stereotyped actions. As with stereotypies, stypic is only scored after three repetitive acts.

---

**Depressive-like behaviors:**

Face wall: Subject's body posture and/or ventrum are oriented toward wall of cage and are within 6 inches of wall.

Huddle: Huddle is a fetal-like self-enclosed position with head at or lower than shoulder level.

Passive: Maintenance of a non-locomotive behavior with no simultaneously scoreable behaviors except for self-directed behaviors or vocalizations.

---

**Externally oriented behaviors:**

Environmental exploration: Any manual, oral or pedal examination, exploration, or manipulation of the physical environment.

Locomotion: Any self-induced change in location.

Social contact: Includes proximity, groom and receive groom. Also includes any exploration of other animal, and receiving any such exploration from other monkey.

Vocalization: Any vocal sound emitted by the subject. Can be scored with any other behavior.

---

The following behaviors are mutually exclusive: locomotion, stereotypies, huddling, social contact, and environmental exploration.
